# Supplementary material
Source: MDPI journal article supplement (https://www.mdpi.com/2311-553X/8/3/43)
Supplement: s1 [file s1]

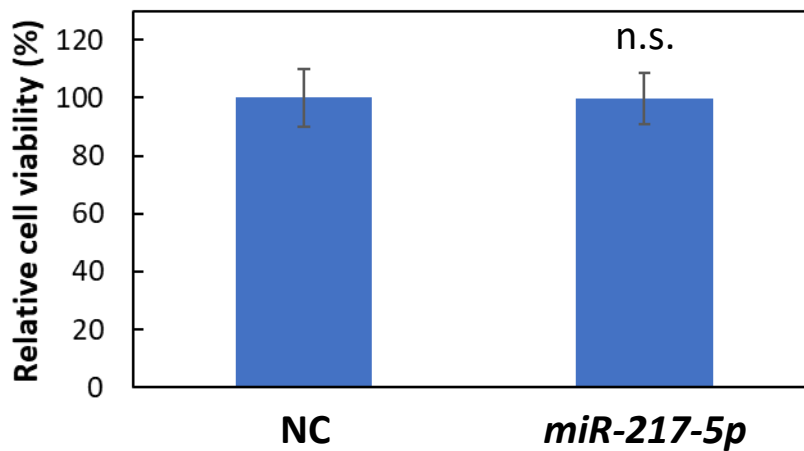

**Figure S1.** Effect of induced *miR-217-5p* expression on cell viability of E11 cells. Cell viability was evaluated at day 4 after transfection. n.s.: not significant compared to the NC-transfected cells.

**A**

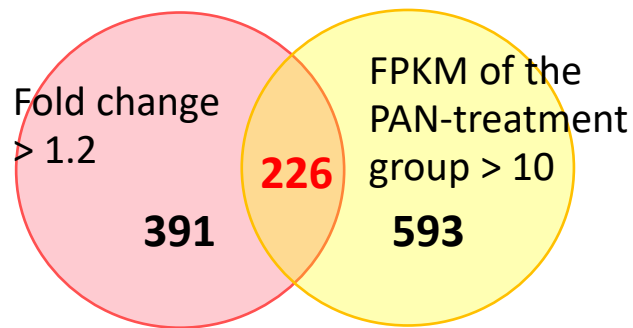

**B**

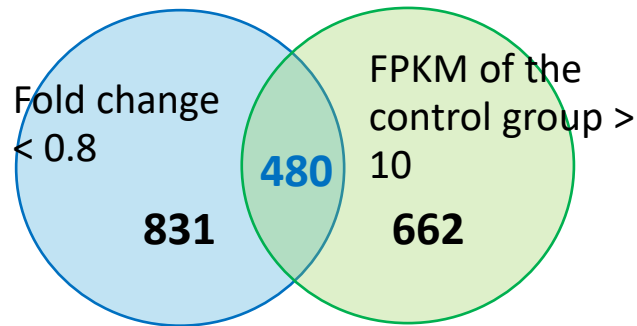

**Figure S2.** Selection of mRNAs dysregulated in PAN-treated podocytes. The numbers of upregulated (A) and downregulated (B) mRNAs selected based on the criteria are shown.

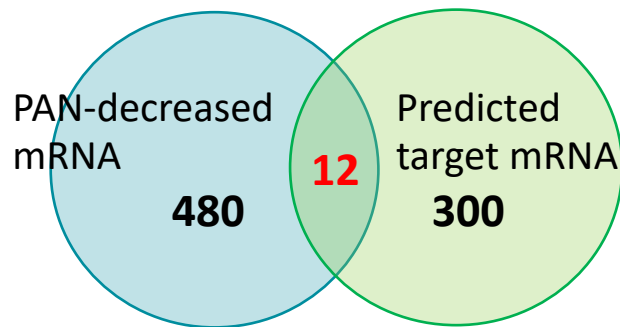

**Figure S3.** Selection of mRNAs possibly targeted by *miR-217-5p*.



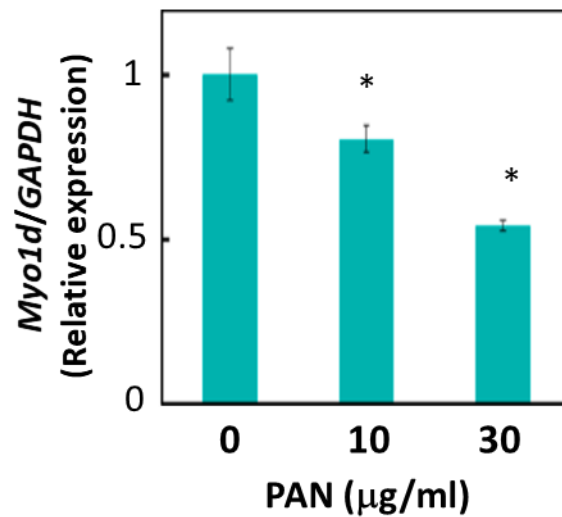

**Figure S5.** *Myo1d* mRNA levels in PAN-treated primary rat podocytes. Values were normalised relative to *GAPDH* mRNA expression. Primary rat podocytes were treated with 0-30 µg/ml PAN. The relative expression level of *Myo1d* mRNA at 0 µg/ml PAN was given an arbitrary value of 1. \* $p < 0.05$  versus 0 µg/ml PAN. Data represent the means  $\pm$  SD.

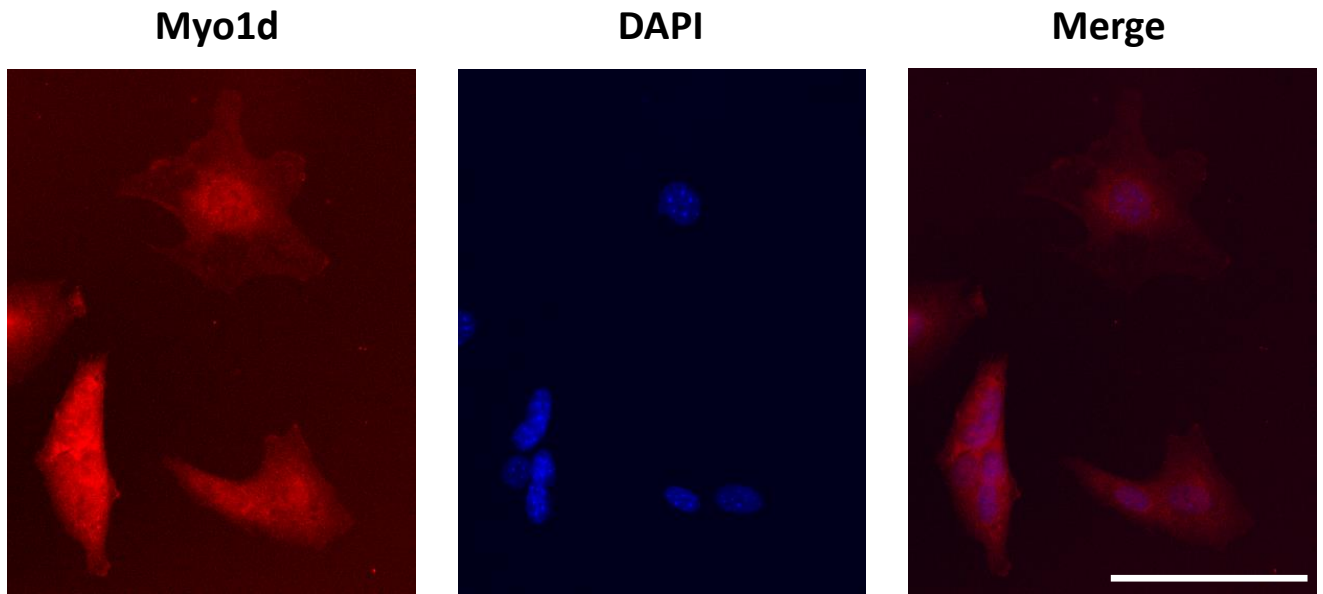

**Figure S6.** Immunocytochemical detection of Myo1d protein in E11 cells. Myo1d proteins were detected in the cytosol of E11 cells. The cytosolic localisation of Myo1d proteins have been also shown in the human bone osteosarcoma cell line U-2 OS (The Human Protein Atlas database; <https://www.proteinatlas.org/ENSG00000176658-MYO1D/subcellular#>). Bar: 100  $\mu$ m.

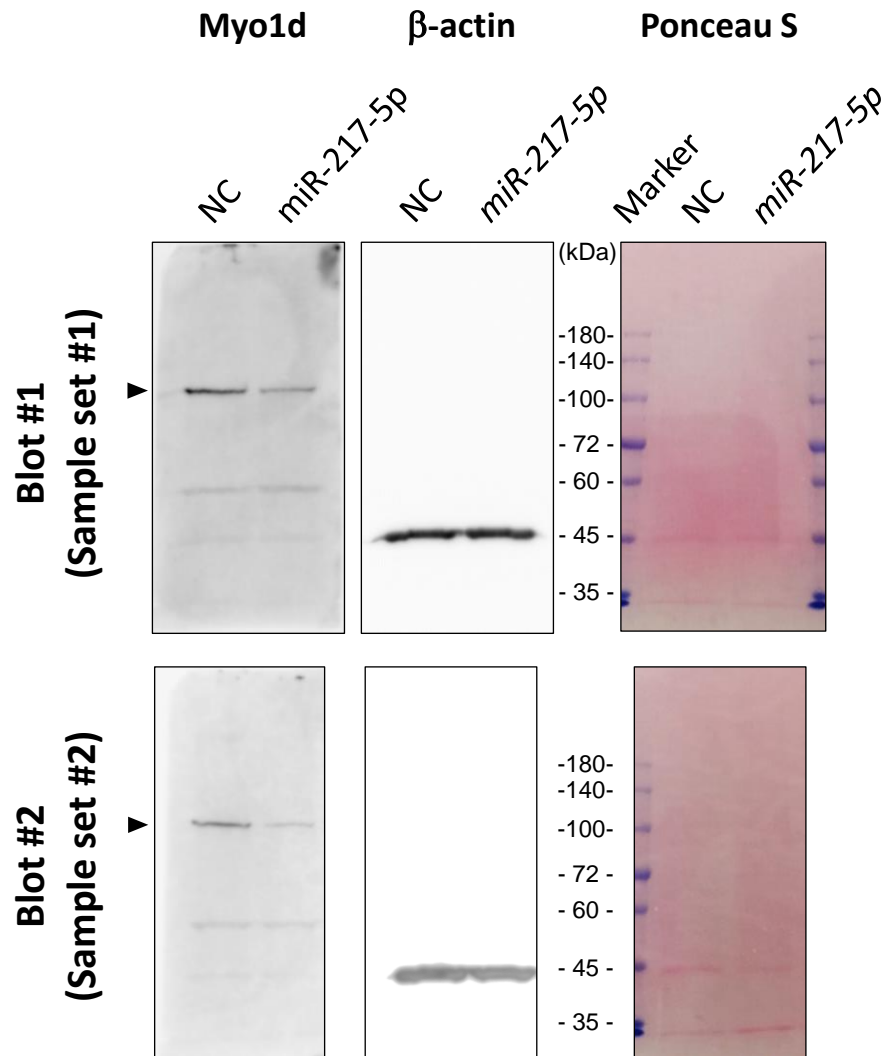

**Figure S7.** Western blot images showing the detection of Myo1d protein in E11 cells with induced *miR-217-5p* expression. Arrowheads indicate the immunodetected bands of Myo1d protein.

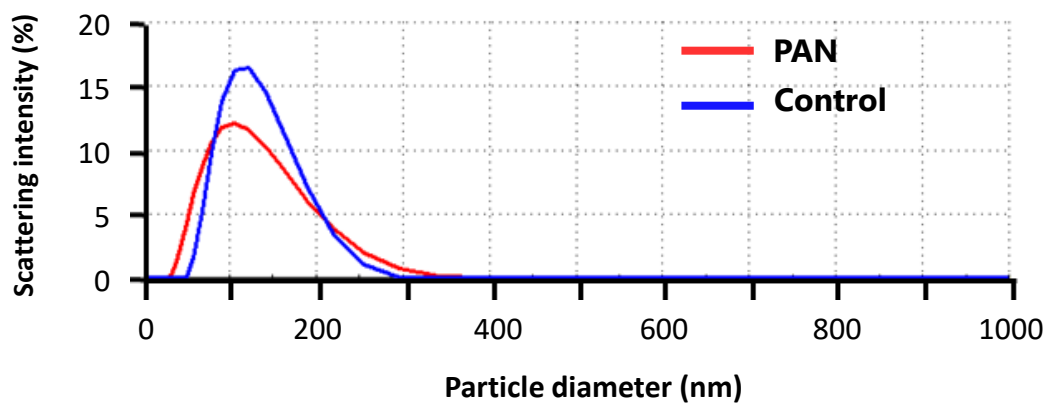

**Figure S8.** Size distribution of particles in urine from Wistar rats administrated with PAN (100 mg/kg) or saline. Whole particles in the urine were isolated by ultracentrifugation and analysed by dynamic light scattering.
