# Supplementary material
Source: MDPI journal article supplement (https://www.mdpi.com/2311-553X/8/3/43)
Supplement: s1 [file s1]

**Table S1.** Primers designed for SYBR qRT-PCR.

| Target                 |         | Sequence (5' to 3')    |
|------------------------|---------|------------------------|
| <i>Mouse</i>           | Forward | GAGAGCCTTGAGTTCGGCAA   |
| <i>Myo1d</i>           | Reverse | GTCCTTTCTCAAATCTGAGCCT |
| <i>Rat</i>             | Forward | GTCATGTCCGAAAGGTGAATCG |
| <i>Myo1d</i>           | Reverse | GACACACTCAGGCCAGTCAA   |
| <i>Rat</i>             | Forward | GGACCTGGACGACATAGTGC   |
| <i>GAPDH</i>           | Reverse | CCGCCAACATGATTCTCCGA   |
| <i>Mouse &amp; rat</i> | Forward | GGCCCTGTAATTGGAATGAGTC |
| <i>18S rRNA</i>        | Reverse | CCAAGATCCAACCTACGAGCTT |
