# Supplementary material
Source: MDPI journal article supplement (https://www.mdpi.com/2311-553X/8/3/43)
Supplement: s1 [file s1]

**Table S5.** Decreased *Myo1d* mRNA expression in injured human podocytes based on the RNA sequencing datasets registered under the accession GSE124622 in Gene Expression Omnibus.

| Podocyte<br>injury inducer | RPKM <sup>a</sup> (Control) |       |       | RPKM (Experiment) |       |       | Basement<br>mean | Fold<br>change | <i>P</i> value | <i>P</i> adj <sup>b</sup> |
|----------------------------|-----------------------------|-------|-------|-------------------|-------|-------|------------------|----------------|----------------|---------------------------|
|                            | No. 1                       | No. 2 | No. 3 | No. 1             | No. 2 | No. 3 |                  |                |                |                           |
| PAN                        | 638                         | 1023  | 1456  | 482               | 394   | 487   | 744              | 0.410          | 7.55E-06       | 2.86E-05                  |
| Adriamycin                 | 638                         | 1023  | 1456  | 422               | 706   | 602   | 779              | 0.641          | 0.0364         | 0.118                     |

<sup>a</sup>RPKM: reads per kilobase of exon per million mapped reads

<sup>b</sup>*P* value adjusted using Benjamini & Hochberg method.
