# Supplementary material
Source: MDPI journal article supplement (https://www.mdpi.com/2311-553X/8/3/43)
Supplement: s1 [file s1]

**Table S2.** The summary of small RNA sequencing results.

|                                              | podocyte_1_cont_R1<br>(absolute values) | podocyte_1_PAN_R1<br>(absolute values) | podocyte_2_cont_R1<br>(absolute values) | podocyte_2_PAN_R1<br>(absolute values) | podocyte_3_cont_R1<br>(absolute values) | podocyte_3_PAN_R1<br>(absolute values) |
|----------------------------------------------|-----------------------------------------|----------------------------------------|-----------------------------------------|----------------------------------------|-----------------------------------------|----------------------------------------|
| Total number of reads                        | 12,868,529                              | 13,350,898                             | 12,094,850                              | 13,004,992                             | 8,635,242                               | 13,479,157                             |
| Aligned reads                                | 11,110,540                              | 12,109,253                             | 10,342,259                              | 11,533,336                             | 7,624,667                               | 11,132,414                             |
| - Uniquely matched reads                     | 7,018,093                               | 8,113,886                              | 6,572,343                               | 7,517,159                              | 4,917,024                               | 6,576,953                              |
| - Multiply matched reads                     | 2,528,594                               | 2,578,279                              | 2,186,365                               | 2,540,933                              | 1,625,248                               | 2,735,021                              |
| - Partially aligned reads                    | 1,563,853                               | 1,417,088                              | 1,583,551                               | 1,475,244                              | 1,082,395                               | 1,820,440                              |
| Unaligned reads                              | 1,367,472                               | 1,002,074                              | 1,455,526                               | 1,265,173                              | 789,600                                 | 1,832,455                              |
| - No matches found                           | 225,239                                 | 93,971                                 | 403,801                                 | 166,271                                | 181,952                                 | 241,442                                |
| - Too many matches                           | 1,142,233                               | 908,103                                | 1,051,725                               | 1,098,902                              | 607,648                                 | 1,591,013                              |
| Reads ignored due to failure of<br>vendor QC | 0                                       | 0                                      | 0                                       | 0                                      | 0                                       | 0                                      |
| Reads ignored due to small size              | 390,517                                 | 239,571                                | 297,065                                 | 206,483                                | 220,975                                 | 514,288                                |
| Maximum read length                          | 50                                      | 50                                     | 50                                      | 50                                     | 50                                      | 50                                     |
| Average read length                          | 19                                      | 19                                     | 21                                      | 20                                     | 21                                      | 19                                     |
